1 **Time-resolved dual RNA-Seq reveals extensive rewiring of lung epithelial**  
2 **and pneumococcal transcriptomes during early infection**

3

4 **Rieza Aprianto<sup>1</sup>, Jelle Slager<sup>1</sup>, Siger Holsappel<sup>1</sup> and Jan-Willem Veening<sup>1,\*</sup>**

5

6 <sup>1</sup>Molecular Genetics Group, Groningen Biomolecular Sciences and Biotechnology Institute,  
7 Centre for Synthetic Biology, University of Groningen, Nijenborgh 7, 9747 AG Groningen,  
8 The Netherlands.

9

10 \*Correspondence to: [j.w.veening@rug.nl](mailto:j.w.veening@rug.nl), Tel: +31 (0)50 3632408, [@jwveening](#)

11

12 **Keywords:** *Streptococcus pneumoniae*, transcriptomics, dual RNA-Seq, host-pathogen  
13 interaction, adherence, lung epithelial cells

14

## 15 Main Points

- 16 • Early pneumococcal infection model for dual RNA-Seq has been established
- 17 • Simultaneous RNA isolation, rRNA depletion and sequencing are suitable for dual
- 18 RNA-Seq
- 19 • Gene expression data of host and pathogen is presented in an online user-friendly
- 20 database (<http://dualrnaseq.molgenrug.nl>)
- 21 • A capsular mutant revealed adherence-specific host and pathogen transcriptional
- 22 changes: repression of innate epithelial immune response and activation of
- 23 pneumococcal sugar importers

## 24 Graphical Abstract

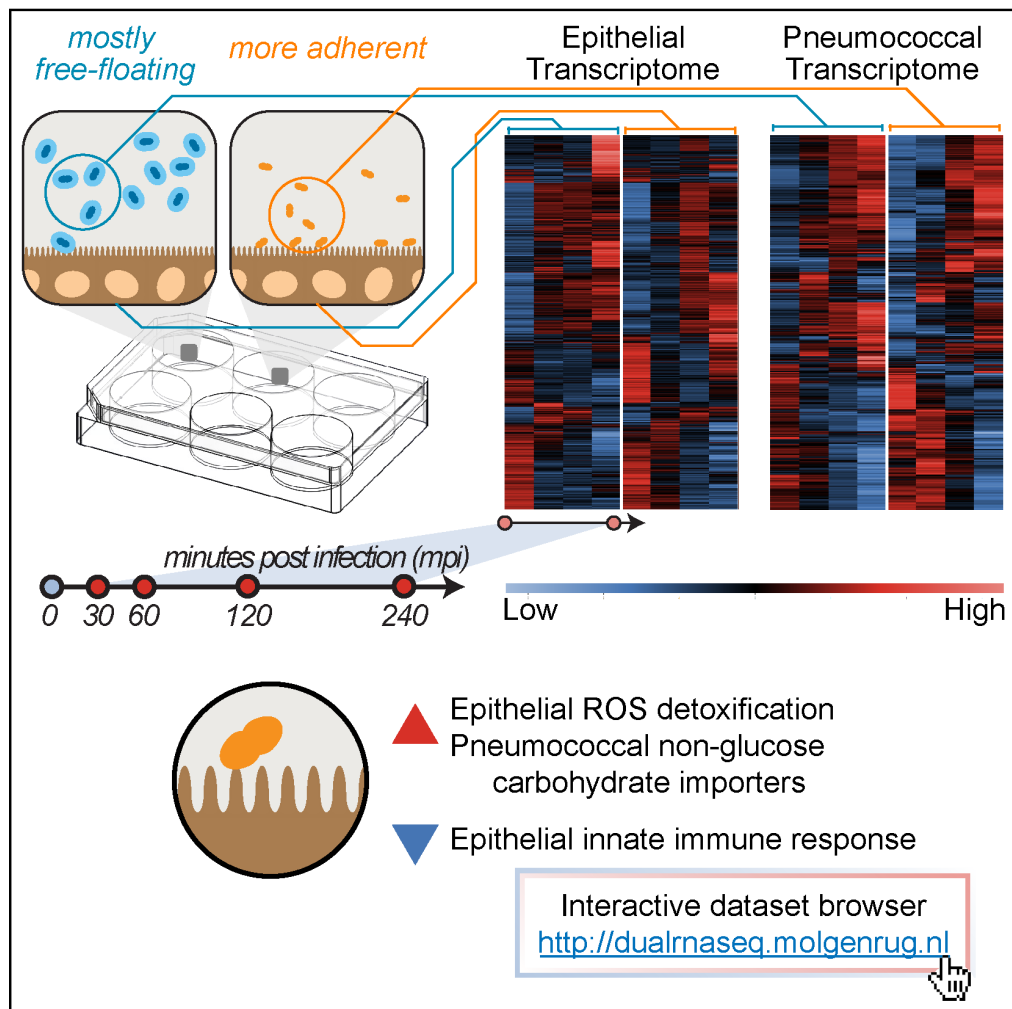

25

## 26 **Abstract**

27 *Streptococcus pneumoniae* (pneumococcus) is the main etiological agent of pneumonia.  
28 Pneumococcal pneumonia is initiated by bacterial adherence to lung epithelial cells.  
29 Infection to the epithelium is a disruptive interspecies interaction involving numerous  
30 transcription-mediated processes. Revealing transcriptional changes may provide valuable  
31 insights into pneumococcal disease. Dual RNA-Seq allows simultaneous monitoring of the  
32 transcriptomes of both host and pathogen. Here, we developed a time-resolved infection  
33 model of human lung alveolar epithelial cells by *S. pneumoniae* and assessed  
34 transcriptome changes by dual RNA-Seq. Our data provide new insights into host-microbe  
35 interactions and show that the epithelial glutathione-detoxification pathway is activated by  
36 bacterial presence. We observed that adherent pneumococci, not free-floating bacteria,  
37 access host-associated carbohydrates and repress innate immune responses. In  
38 conclusion, we provide a dynamic dual-transcriptomics overview of early pneumococcal  
39 infection with easy online access (<http://dualrnaseq.molgenrug.nl>). Further database  
40 exploration may expand our understanding of epithelial-pneumococcal interaction, leading  
41 to novel antimicrobial strategies.

## 42 Introduction

43 Lower respiratory tract infections (LRTIs), or pneumonia, claim more lives than any other  
44 communicable disease worldwide; the main etiologic agent behind this infection is the  
45 Gram-positive opportunistic pathogen *Streptococcus pneumoniae* (pneumococcus, Prina et  
46 al., 2015). Normally part of the human nasopharyngeal microflora, *S. pneumoniae* can  
47 invade the lower airways where it provokes host inflammatory and immune responses  
48 (Kadioglu et al., 2008). At the earliest stage of infection, pneumococcus adheres to  
49 epithelial cells and interacts intimately with the epithelium (Hammerschmidt et al., 2007).  
50 Meanwhile, host and pathogen cross-communicate and, they simultaneously, affect each  
51 other in a disruptive manner (Kadioglu et al., 2008; Lee et al., 2004). This interspecies  
52 interaction activates numerous processes in epithelial and pneumococcal cells (Bootsma et  
53 al., 2007; Mlacha et al., 2013). To obtain comprehensive and meaningful biological  
54 knowledge of the infection processes involved in pathogenesis, simultaneous monitoring of  
55 the transcriptome changes in both species is required (Westermann et al., 2012).

56 Lung epithelial cells perform vital roles during infection. First, the cells form a  
57 physical barrier to the external environment. On top of these cells, a thick layer of epithelial-  
58 derived mucus offers extra protection that traps and removes pathogens (Voynow and  
59 Rubin, 2009). Mucins, the main component of mucus, are large glycoprotein-polymers rich  
60 in sialic acids and other aminosaccharides (Rose and Voynow, 2006). Additionally,  
61 epithelial cells kill pathogens directly by producing antimicrobial peptides, e.g.: defensins  
62 and cathelicidins (Teclé et al., 2010). Moreover, epithelial cells regulate innate immune  
63 responses by secreting a wide array of pro-inflammatory cytokines, that recruit neutrophils  
64 and activate macrophages (Hallstrand et al., 2014). Finally, epithelial cells activate adaptive  
65 immune cells, including dendritic cells and T-cells via chemokine expression (Soumelis et  
66 al., 2002).

67 Pneumococcal adherence to epithelial cells is the first necessary step to  
68 pathogenesis (Bogaert et al., 2004). In order to adhere, pneumococcus must quickly shed  
69 the thick exopolysaccharide capsule, which protects against phagocytes (Abeyta et al.,  
70 2003; Hyams et al., 2010). The shedding exposes surface adhesion factors and  
71 desensitizes the bacterium from antimicrobial peptides (Beiter et al., 2008; Kietzman et al.,  
72 2016). Subsequently, *S. pneumoniae* must acquire nutrients to support growth and, at the  
73 same time, evade host immune responses (Shelburne et al., 2008). Pneumococcal factors  
74 may be involved in multiple processes, e.g.: PsaA, a surface-exposed protein, acts  
75 concurrently as adhesion factor and manganese transporter (Rajam et al., 2008). The  
76 scarce manganese (Gray et al., 2010) helps in neutralizing reactive oxygen species (ROS)  
77 and bacterial fitness (Tseng et al., 2002).

78 Interspecies interaction during infection is a chaotic process which necessitates rapid  
79 and massive adaptation for epithelial and pneumococcal survival. During the adaptation,  
80 transcriptional changes plays a focal point both in host (Jenner and Young, 2005) and in  
81 pathogen (Sorek and Cossart, 2010). RNA-sequencing (RNA-Seq) delivers genome-wide  
82 quantitative snapshots of the transcriptome (Kukurba and Montgomery, 2015). In a thought  
83 experiment, Vogel and co-workers argued that simultaneous profiling of host and pathogen  
84 transcriptomics by dual RNA-Seq might provide valuable insights for infection biology  
85 (Westermann et al., 2012). Recent dual RNA-Seq studies were successful in elucidating the  
86 role of sRNAs in the intracellular pathogen *Salmonella typhimurium* (Westermann et al.,  
87 2016), cross-talk in the Gram-negative LRTI pathogen *Haemophilus influenzae* (Baddal et  
88 al., 2015) and transcription profiles in the protozoan *Leishmania major* (Dillon et al., 2015)  
89 during their respective infection.

90 Here, we exploited the dual RNA-Seq approach to simultaneously monitor the  
91 transcriptome cross-talk between lung alveolar epithelial cells and pneumococci during  
92 early infection. Due to the transient and highly-dynamic nature of the transcriptome  
93 (Pedersen et al., 2011), we monitored the transcriptional changes in a time-resolved  
94 manner. Moreover, since pneumococcal adherence to epithelial cells determines the  
95 outcome of early infection, we compared adherent and non-adherent *S. pneumoniae* to  
96 allow specific transcriptional interrogation on adherence. Additionally, we confirmed our  
97 dual RNA-Seq gene expression data by qRT-PCR and quantitative fluorescence  
98 microscopy to visualize pneumococcal proteins and thereby confirm several novel biological  
99 observations identified in the dataset. Finally, we developed a user-friendly online database  
100 (<http://dualrnaseq.molgenrug.nl>), giving access of our detailed time-resolved dual  
101 transcriptomes data to the pneumococcal, microbiology, immunology and pulmonology  
102 research communities.

103

## 104 **Results**

### 105 **The early pneumococcal infection model to epithelial cells**

106 At the first phase of LRTI, *S. pneumoniae* adheres to the sterile apical-side of epithelial  
107 cells, adaptation of bacterial transcriptome occurs followed by bacterial outgrowth (Mlacha  
108 et al., 2013), which in turn stimulate epithelial transcriptional responses to their presence  
109 (Bootsma et al., 2007). We aimed to recapitulate these events in an *in vitro* model  
110 consisting of co-incubation of the pathogenic *S. pneumoniae* strain D39 (serotype 2) to a  
111 confluent layer of type II lung alveolar human epithelial cell (A549) at a multiplicity of  
112 infection (MOI) of 10, i.e., ten pneumococci per epithelial cell (**Fig.1A**). Five time points up

113 to 4 hours after infection were selected to capture both early transcriptome responses (30  
114 and 60 mpi) and later responses (120 and 240 mpi). Six technical replicates (individual  
115 wells) were pooled into one biological replicate. Two biological replicates were used for  
116 each time point, except for 240 mpi where we only obtained one replicate (Fig.1E). In order  
117 to elucidate adherence-specific expression, we incorporated an isogenic unencapsulated  
118 D39 strain ( $\Delta cps2E$ ) with increased adherence to epithelial cells into the model (Kjos et al.,  
119 2015). The capsular mutant showed significantly greater capacity to adhere to epithelial  
120 cells than its encapsulated parental strain ( $p < 0.001$ , **Fig.1C**). During infection, the total  
121 number of cells of both strains were significantly ( $p < 0.01$ ) increased after 4 hours (**Fig.1D**),  
122 showing that both strains multiply in the model, thereby recapitulating one of the  
123 characteristics of infection. To minimize transcriptional changes because of sample  
124 handling, we did not separate cellular mixtures before total RNA isolation (epithelial cells,  
125 adherent pneumococci and free-floating pneumococci, **Fig.1E**, see **Supplementary**  
126 **Information**).

127 To analyze the time-resolved dual RNA-Seq dataset, a combination of freely  
128 available bioinformatics tools was used (**Fig.1F**). First, raw reads were trimmed (Bolger et  
129 al., 2014) and aligned (Dobin et al., 2013) to a chimeric genome containing the  
130 concatenated genome of *Homo sapiens* (GRCh38, Ensembl) and *S. pneumoniae* D39  
131 (NC\_008533.1, NCBI). The one-step mapping was chosen to minimize rates of false  
132 negatives. Reads were then separately counted (Liao et al., 2014) and classified as either  
133 epithelial or pneumococcal. Following differential gene expression analysis, three groups of  
134 genes were removed (see below) and unbiased automatic clustering (Kumar and E.  
135 Futschik, 2007) and functional enrichment were performed (Dennis et al., 2003; van  
136 Opijnen and Camilli, 2012).

137  
138 **Dual RNA-Seq generates high-quality datasets with clusters of epithelial and**  
139 **pneumococcal co-expressed genes**

140 Dual RNA-seq generated single end 75 nt reads. We sequenced to such depth, that on  
141 average each library has 70 million reads (30 to 95 million). After adapter trimming and  
142 removal of low-quality reads, we retained 92% (89.0-93.0%). Subsequently, 79% of reads  
143 (74.6 to 83.0%) successfully aligned to the chimeric genome. Additionally, we concluded  
144 that dual rRNA depletion was successful since only 0.03% of human and 0.24% of  
145 pneumococcal reads mapped as ribosomal RNAs. For each library, we counted 18 million  
146 epithelial reads (26%) and 37 million pneumococcal reads (52%, **Fig.2A**). The high number  
147 of reads in each library and the high fraction of usable reads highlights the quality and  
148 suitability of our approach for dual RNA-Seq: simultaneous total RNA isolation, dual rRNA  
149 depletion and cDNA library preparation. PCA analysis showed no evidence for batch effects  
150 (**Supplementary Figure 1**). Relative enrichment of pneumococcal reads may stem from  
151 the total RNA isolation protocol. Nevertheless, each library contained sufficient epithelial  
152 reads for differential gene expression analysis (The ENCODE Consortium, 2011).

153 To simplify further analyses, we excluded three gene fractions (**Fig.2B**). First, we  
154 removed unexpressed genes, i.e., without any counts in all libraries: 22,991 (38%) epithelial  
155 genes and 24 (1%) pneumococcal genes. The relatively large fraction of unexpressed  
156 epithelial genes is in accordance with recent studies on the human epithelial transcriptome  
157 (Hackett et al., 2012; St-Pierre et al., 2013). Second, we excluded genes that were  
158 differentially expressed ( $p < 0.05$ ) at 0 mpi between unencapsulated ( $\Delta cps2E$ ) and  
159 encapsulated (wt) libraries. While only five epithelial genes were removed, 394 (19%)  
160 pneumococcal genes were already differentially expressed at 0 mpi. Although polar effect  
161 due to *cps2E* disruption can explain differential expression of genes in the 17kb long *cps*



162 operon, it remains unknown why other genes were differentially expressed. We speculate  
163 that constructing the thick exopolysaccharide capsule requires specific transcriptional fine-  
164 tuning of numerous genes outside the *cps* locus. Finally, we removed genes with no  
165 significant difference ( $p>0.05$ ) and genes with fold changes less than 2 in all contrasts  
166 (**Supplementary Figure 2**). In total, the epithelial working libraries contained 4,009 (7% of  
167 total) genes and pneumococcal working libraries 868 (42% of total) genes.

168 To compare gene expression, we normalized expression values using DESeq2  
169 (Love et al., 2014), centered and clustered the values (Kumar and E. Futschik, 2007). The  
170 centered normalized values were visualized as heat maps, divided into two panels, one for  
171 each bacterial strain. Strikingly, heat maps showed obvious clusters of co-expressed genes  
172 and clear gene expression differences between adhering ( $\Delta cps2E$ ) and non-adhering (wt)  
173 bacteria to epithelial cells (**Fig.2CD**). Specifically, the left panel of **Fig.2C** shows the  
174 epithelial transcriptional response exposed to encapsulated *S. pneumoniae* at different time  
175 points (30, 60, 120 and 240 mpi) while the right panel displays the response in contact with  
176 the unencapsulated strain. *Vice versa*, co-expressed clusters in pneumococcal genes are  
177 differentially expressed in contact with human epithelial cells (**Fig.2D**).

178 Making raw data publicly-available has been common practice in recent years, as we  
179 have done for this project (GEO accession number GSE79595). Unfortunately, publicly  
180 available datasets do not translate to direct exploration and extraction of biological insights  
181 for the majority of researchers. Therefore, we built an easily-accessible online platform  
182 which hosts the complete dual RNA-Seq database. To access and visualize the data, users  
183 can simply select the gene of interest (or multiple genes of interests) and examine their  
184 expression during early infection (**Supplementary Figure 3**). Expression data can be  
185 downloaded and opened in common spreadsheet software e.g.: Microsoft Excel®. To

186 visualize expression, users can choose from three normalization methods: DESeq2  
187 normalization (Love et al., 2014), TPM (transcript per million, Wagner et al., 2012) and  
188  $\log_2$  -transformed TPM values.

189

## 190 **Validation of dual RNA-Seq by qRT-PCR and pneumococcal protein fusions**

191 To confirm dual RNA-Seq data by quantitative real-time PCR (qRT-PCR), we chose 10  
192 epithelial genes (*ABCC2*, *AKR1B10*, *AKR1C3*, *ALDH1A1*, *DEFB1*, *DKK1*, *IDH1*, *NOLC1*,  
193 *PTGES* and *TXNRD1*) and 19 pneumococcal genes (*amiC*, *blpY*, *dinF*, *hrcA*, *infC*, *lytA*,  
194 *malC*, *manL*, *msmR*, *nrdD*, *pulA*, SPD\_0249, SPD\_0392, SPD\_0475, SPD\_0961,  
195 SPD\_0990, SPD\_1517, SPD\_1711 and SPD\_1798). The target genes were selected  
196 because of their varied expression profiles: increasing, decreasing or unchanged. The cycle  
197 threshold (Ct) for epithelial transcripts were normalized against *ACTB* ( $\beta$ -actin) while  
198 pneumococcal transcripts were normalized to *gyrA* (gyrase A). The reference genes were  
199 highly expressed and did not show significant changes ( $p > 0.05$ ,  $FC < 2$ ) between any time  
200 points during early infection. The qRT-PCR fold change was calculated by the  $\Delta\Delta C_t$  method  
201 (Livak and Schmittgen, 2001) to one time point. Fold changes obtained by qRT-pCR and  
202 dual RNA-Seq showed a relatively high correlation for both species: epithelial transcripts,  
203 ( $R^2=0.72$ ) and pneumococcal transcripts, ( $R^2=0.73$ , **Fig.3A**), validating the reliability of dual  
204 RNA-Seq data.

205 Since transcript levels do not necessarily correspond with protein expression (Ning  
206 et al., 2012; Taniguchi et al., 2010), we quantified four pneumococcal protein levels whose  
207 genes showed upregulation during adherence to epithelial cells. We fused a fast-folding  
208 variant of the green fluorescent protein (GFP) to the carboxy-termini of SPD\_0475,  
209 SPD\_0963, SPD\_1711 and SPD\_1716, at their own locus while preserving all upstream

210 regulatory elements (**Fig.3B**). We transformed these constructs into the *hlpA\_hlpA-rfp*,  
211  $\Delta cps2E$  genetic background (Kjos et al., 2015). SPD\_0475 encodes a 204 amino acids (aa)  
212 CAAX amino terminal protease with unknown function. SPD\_0963 encodes a 45 aa  
213 hypothetical protein. SPD\_1711 (132 aa) was described as a single stranded DNA binding  
214 protein and may assist in competence (Attaiech et al., 2011) and SPD\_1716 is a 63 aa  
215 ortholog of cell wall or choline binding protein in other *Streptococcaceae*.

216 We imaged adherent *S. pneumoniae* with fluorescence microscopy during the  
217 indicated time points (**Fig.3C**). Since (i) RFP serves as an accurate proxy for cell number  
218 and viability (Kjos et al., 2015), (ii) *hlpA* does not change during early infection ( $p > 0.05$ ,  
219  $FC < 2$ ) and (iii) ratio between the GFP and RFP indicates relative expression of the protein  
220 of interests (red circle and line, **Fig.3D**), we were able to quantify the proteins of interest.  
221 Gene expression values from the dual RNA-Seq data (blue circles and line, **Fig.3D**) show a  
222 degree of correlation with protein level in three out of the four cases – suggesting that  
223 pneumococcal transcriptional changes reflects, to some extent, changes in protein level  
224 (Vogel and Marcotte, 2012).

225

## 226 **Pneumococcal ROS induces expression of glutathione-mediated detoxification** 227 **genes in epithelial cells**

228 Along with pneumococcal adherence and multiplication, we aimed to recapitulate the host  
229 response in our model. We hypothesized that the epithelial transcriptome adapts in  
230 response to bacterial presence, independent of adherence. To identify the responsive  
231 genes, we automatically clustered epithelial working libraries exposed to wild type  
232 pneumococci. 242 epithelial genes were co-expressed in a similar manner (**Fig.4A**), i.e.,  
233 lowly expressed at 30 mpi then sustained upregulation thereafter. Gene ontology (GO)

234 enrichment (Dennis et al., 2003) indicated that 26 of the subset are associated with  
235 oxidation and reduction ( $p=5.7 \cdot 10^{-4}$ ). Moreover, 9 genes are associated directly with  
236 glutathione, an ubiquitous antioxidant: *GCLC* and *GCLM*, in glutathione biosynthesis; *GPX2*  
237 and *MGST2* in detoxification; and *GSR*, *IDH1*, *IDH2*, *PGD* and *G6PD* in glutathione  
238 recycling.

239 Glutathione, a tripeptide of glutamic acid, cysteine and glycine, is produced and  
240 secreted by epithelial cells (Valko et al., 2007). The vital molecule is biosynthesized through  
241 amino-acid polymerization and when subjected to ROS (hydrogen peroxide, lipid  
242 superoxide or oxygen radicals), glutathione readily donates an electron or hydrogen atom to  
243 quench the ROS. The process is assisted by ligands and glutathione peroxidase (*GPX2*).  
244 Oxidized glutathione can be recycled by glutathione reductase (*GSR*) dependent on  
245 NADPH (**Fig.4B**). Alternatively, glutathione conjugates and neutralize ROS (Forman et al.,  
246 2009). Expression of nine glutathione-associated genes showed a sustained significant  
247 increase in epithelial cells exposed to encapsulated strain ( $p<0.05$ , 60 vs. 30 mpi, **Fig.4C**).

248 To validate the abovementioned finding, we repeated the experiment, isolated total  
249 RNA and performed qRT-PCR on four genes: *GPX2*, involved in detoxification and *GSR*,  
250 *IDH1* and *PGD*, in glutathione recycling. As expected, we observed significant upregulation  
251 of these genes between 30 and 60 mpi (**Fig.4D**). Interestingly, Rai et al (2015) showed that  
252 pneumococcal supernatant is sufficient to instigate oxidative damage in A549. Indeed,  
253 when epithelial cells were incubated with filtered pneumococcal supernatants, the genes  
254 were activated (**Fig.4D**). To establish that pneumococci-derived ROS was behind the  
255 response, we added the antioxidant, resveratrol (100  $\mu$ M) to the epithelial-pneumococcal  
256 model and did not observe activation (**Fig.4D**) as shown by (Zahlten et al., 2015).

257

258 **Adherent *S. pneumoniae* repress epithelial innate immune response**

259 Contrasting epithelial gene expression in response to encapsulated and unencapsulated  
260 pneumococci allowed us to specifically identify adherence-responsive genes. In doing so,  
261 we identified 271 adherence-responsive ( $p < 0.05$ ) epithelial genes, of which 25 genes are  
262 activated (fold change,  $FC > 2$ ) and 248 repressed ( $FC > 2$ ) during early-infection (**Fig.5A**).  
263 Two genes, *PTGS2* and *HIST1H4B* showed repression and activation at more than one  
264 time point. Subsequently, GO-term enrichment in the subset of repressed genes at 60 mpi  
265 showed that “immune response” to be enriched in 16 genes ( $p = 2.3 \cdot 10^{-4}$ , **Fig.5B**).

266 *CXCL8* (*IL8*), encoding interleukin-8, was one of the repressed immunity gene.  
267 *CXCL8* is a potent chemoattractant for neutrophil and other granulocytes. Interestingly, at  
268 60 mpi,  $\Delta cps2E$ -exposed epithelial cells, expressed  $2.5 \pm 1.3$  less *CXCL8* than epithelial  
269 cells exposed to wild type *S. pneumoniae* (**Fig.5C**). This difference was validated by qRT-  
270 PCR (**Fig.5D**). Further, we asked whether *CXCL8* repression is an active process or merely  
271 mediated by physical adherence. To assess this, we co-incubated heat-inactivated  $\Delta cps2E$   
272 and heat-inactivated wild type with epithelial cells. Note that heat inactivation preserves  
273 pneumococcal epitope and protein structures (Hvalbye et al., 1999). *CXCL8* was still  
274 significantly repressed by dead  $\Delta cps2E$  but not by dead wild type pneumococci (**Fig.5D**) –  
275 suggesting that *CXCL8* repression is independent of viability but dependent to presence of  
276 the capsule or to the accessibility of surface-exposed (protein) factors in capsule absence.  
277 Intriguingly, Graham and Paton (2006) showed that epithelial interleukin-8 production and  
278 release was suppressed by pneumococcal surface protein CbpA and incubation with  $\Delta cbpA$   
279 leads to higher *CXCL8* expression. We speculate that the absence of capsule in  $\Delta cps2E$   
280 increases accessibility of pneumococcal surface-exposed factors, including CbpA to  
281 epithelial receptors, leading to repression of *CXCL8*.

282 *DEFB1*, encoding  $\beta$ -defensin-1 an important epithelial-derived constitutively-  
283 expressed antimicrobial peptide (Krisanaprakornkit et al., 1998), is another repressed  
284 immunity gene. However, in our model, *DEFB1* was repressed  $3.0 \pm 1.2$  times ( $p < 0.05$ , 60  
285 mpi) in  $\Delta cps2E$ -exposed epithelial cells compared to wild type-exposed cells (**Fig.5C**,  
286 validated in **Fig.5D**). Additionally, while heat-inactivated wild type pneumococci stimulate  
287 comparable levels of *DEFB1* compared to viable wild type bacteria, non-viable  $\Delta cps2E$   
288 repressed *DEFB1* expression even lower ( $p < 0.05$ ) than viable  $\Delta cps2E$  (**Fig. 5D**). We  
289 conclude that *DEFB1* expression is affected by adherence, accessibility of pneumococcal  
290 surface proteins and pneumococcal viability by an as of yet unknown mechanism. In  
291 summary, we show that adherent pneumococci modulate epithelial expression of innate  
292 immunity genes, including *CXCL8* and *DEFB1*, mediated by pneumococcal surface factors.

293

#### 294 **Adherent *S. pneumoniae* activate sugar-importers**

295 Consistent to the epithelial analysis, we contrasted pneumococcal gene expression  
296 between unencapsulated and encapsulated libraries, resulting in 248 differentially  
297 expressed ( $p < 0.05$ ) genes. Specifically, 110 pneumococcal genes of the 248 were  
298 activated ( $FC > 2$ ) in the unencapsulated strain while 133 genes were repressed ( $FC > 2$ ,  
299 **Fig.6A**). Five genes, SPD\_0188, SPD\_0226, SPD\_0415, SPD\_1717 and SPD\_1988,  
300 showed repression and activation at different time points. We used gene classes developed  
301 for *S. pneumoniae* TIGR4 (van Opijnen and Camilli, 2012) to categorize adherence-  
302 responsive genes (**Fig.6B**). Excitingly, most of the adherence-responsive genes are of  
303 unknown function (133 of 248 genes, 54%), highlighting our paucity of knowledge in  
304 pneumococcal gene function. A large part of the subset (36 genes, 15%) are involved in  
305 cellular transport (**Fig.6B**). Since the pneumococcal genome has an exceptionally high

306 number of carbohydrate transporters (Bidossi et al., 2012), it is not surprising that 15 of the  
307 genes encode for sugar transporters (**Fig.6C**).

308 At 60 mpi, 11 carbohydrate transporters were differentially expressed ( $p < 0.05$ ,  
309  $FC > 2$ ) between  $\Delta cps2E$  and encapsulated pneumococci exposed to epithelial cells. In the  
310 presence of high glucose ( $2\text{g}\cdot\text{L}^{-1}$ ),  $\Delta cps2E$  expressed 1.5 fold less *manLM*, encoding  
311 glucose transporters, than encapsulated *S. pneumoniae* (**Fig.6D**). Moreover, seven  
312 importers were activated in the adherent strain compared to the free-floating encapsulated  
313 strain. The seven non-glucose transporter-genes and their substrates are SPD\_0089  
314 (disaccharides: galactose, mannose, N-acetylmannosamine), *celC* (disaccharides:  
315 cellobiose, gentiobiose), SPD\_0232/33/34 (disaccharides: cellobiose), *rafE*  
316 (oligosaccharides: raffinose, stachyose, mellobiose) and *malD* (polysaccharides:  
317 maltotriitol, maltodextrine, glycogen, **Fig.6D**). At the same time, four genes were repressed  
318 in unencapsulated *S. pneumoniae* exposed to human epithelial cells, *glpF* (glycerol) and  
319 SPD\_0740/41/42 (ribonucleosides). We selected three transporter-genes, *malD*  
320 (polysaccharides), *rafE* (oligosaccharides) and SPD\_0234 (disaccharides) and validated  
321 the abovementioned observations by qRT-PCR (**Fig.6E**).

322 Our data indicate that adherent unencapsulated bacteria detect non-glucose sugars  
323 in their immediate vicinity. Epithelial mucus may provide non-glucose carbohydrates  
324 (Yesilkaya et al., 2008) and simultaneously limit the interaction of epithelial cells to  
325 encapsulated wild type bacteria (Nelson et al., 2007). We, then, removed epithelial-  
326 associated mucus by washing the surface with warm PBS and observed that the genes  
327 were no longer activated ( $FC < 2$ , **Fig.6E**). Next, we incubated pneumococcal strains with  
328 type III porcine mucin ( $5\text{ g}\cdot\text{L}^{-1}$ ), mimicking complex carbohydrate in the medium.  
329 Interestingly, the importers were not differentially expressed between strains ( $FC < 2$ ),



330 indicating similar access to non-glucose sugars (**Fig.6E**). We conclude that following  
331 adherence, *S. pneumoniae* senses an enriched host-derived non-glucose carbohydrate and  
332 in turn, activates transporters to import the now-available sugars.

333

## 334 **Discussion**

335 Early infection is a chaotic and disruptive encounter between host and pathogen. In both  
336 species, a multitude of transcriptional-mediated cellular processes are fine-tuned: activated,  
337 maintained and repressed to ensure survival. The recently-described dual RNA-Seq  
338 approach allows simultaneous host-pathogen monitoring during their interactions (Baddal et  
339 al., 2015; Dillon et al., 2015; Westermann et al., 2016). In this study, we exploited the dual  
340 RNA-Seq approach by application to a pneumococcal infection model to human lung  
341 alveolar epithelial cells. We have generated a detailed time-resolved dataset of epithelial-  
342 pneumococcal transcriptomes up to 4 hours after infection. Moreover, we have validated  
343 the rich dataset by qRT-PCR and quantitative fluorescence microscopy. Furthermore, we  
344 have shown that adherence-specific transcriptional responses in host and pathogen can be  
345 identified by contrasting the transcriptomes of the encapsulated libraries with its  
346 unencapsulated counterpart.

347 Our early-infection model recapitulated three major *in vivo* characteristics of  
348 pneumococcal infection: pneumococcal adhesion, bacterial multiplication and epithelial  
349 responses to pathogenic burden. Our model recapitulated these infection characteristics: (i)  
350 adherence for both encapsulated and unencapsulated pneumococci (**Fig.1**), (ii)  
351 pneumococcal viability and growth during early infection, e.g.: generation of ROS,  
352 expression of carbohydrate importers (**Figs.4** and **6**) and (iii) host response to  
353 pneumococcal presence, e.g.: glutathione-associated detoxification and innate immune



354 response (**Figs.4** and **5**). Further, as shown by regulation of carbohydrate transporters  
355 (**Fig.6**), pneumococci sensed epithelial presence and subsequently adapted their  
356 transcriptome.

357 Remarkably, we observed almost all (99%) pneumococcal genes are expressed at  
358 early infection (**Fig.2**) – in line with recent studies on bacterial transcriptomes adapting to  
359 multiple conditions (Kröger et al., 2013; Nicolas et al., 2012). We speculate that  
360 interspecies interaction necessitates massive pneumococcal transcriptional adaptation.  
361 Moreover, we have observed activation of detoxification genes (*GPX2* and *GSR*) in  
362 epithelial cells protecting against pneumococci-derived ROS (**Fig.4**). Indeed, *S.*  
363 *pneumoniae* has been reported to secrete high levels of peroxides as a by-product of its  
364 pyruvate metabolism (Carvalho et al., 2011) and has recently been shown to cause DNA-  
365 damage-dependent apoptosis in alveolar lung epithelial cells (Rai et al., 2015). In addition,  
366 pneumococcal early competence genes (Martin et al., 2000) were activated in our model  
367 (<http://dualrnaseq.molgenrug.nl> competence subset). Future work should also examine  
368 whether small non-coding RNAs play a role in pneumococcal early infection as they do in  
369 *Salmonella* (Westermann et al., 2016), something that was not explored currently due to the  
370 poor D39 genome annotation in this regard.

371 Our approach can be expanded further by incorporating relevant LRTI agents into  
372 the model. For example, alveolar macrophages and epithelial cells, together, form  
373 epithelium lining of the lower respiratory tract. The cells reciprocally influence cellular  
374 phenotypes and behaviors (Hussell and Bell, 2014), highly relevant to infection. Moreover,  
375 pneumococcal co-infection and secondary infection are not unheard of. Influenzae virus  
376 potentiates *S. pneumoniae* by neuraminidase activity that exposes cryptic epithelial  
377 receptor and facilitates pneumococcal adherence (Siegel et al., 2014). In addition,

378 influenzae infection causes loss of superficial epithelial cells, revealing basal epithelium  
379 (Kash et al., 2011) and aggravating secondary pneumococcal infection. On the other hand,  
380 *H. influenzae* negatively affects pneumococci by recruiting neutrophils and stimulating the  
381 killing of opsonized pneumococci (Lysenko et al., 2010). Incorporation of other agents into  
382 the model and exploiting dual (or triple, quadruple) RNA-Seq approaches may provide  
383 novel insights into respiratory infection.

384         However, complementary approaches, are needed to obtain a full picture of early  
385 infection. Though transcriptome rewiring is a focal point during interspecies interaction  
386 (Jenner and Young, 2005; Sorek and Cossart, 2010), non-transcriptional regulation plays  
387 an important part during early infection. Capsule shedding, a hallmark of pneumococcal  
388 infection, is regulated by autolysin-A (Lyt-A). LytA is activated when the bacterium  
389 encounters alveolar cathelicidin (Kietzman et al., 2016), which is independent of  
390 transcriptional regulation. Heterogeneity of cellular responses is another confounding factor  
391 (Jørgensen et al., 2013). Recently, dual RNA-Seq combined with cell sorting was used to  
392 identify heterogeneous activity of *Salmonella* virulence factor that, in turn, drives  
393 heterogeneous interferons response in macrophage (Avraham et al., 2015). This highlights  
394 the relevance of noise in gene expression and cell-to-cell variability in host-pathogen  
395 interaction. Furthermore, whole organism infection models offers a more systemic  
396 perspective. Dual RNA-Seq approach has been used to monitor infection in wheat-bacteria  
397 (Camillos-Neto et al., 2014) and mosquito-filaria (Choi et al., 2014). Whole organism dual  
398 RNA-Seq is not without its challenges, including averaging (host) effects to gene  
399 expression across all cell types.

400         Besides its relevance in communicable diseases, gained insights into pneumococcal  
401 infection are also applicable to understanding several non-communicable respiratory

402 diseases. Asthma, the most common chronic respiratory disease is a major risk factor for  
403 pneumococcal infection (Talbot et al., 2005). Additionally, COPD (Chronic Obstructive  
404 Pulmonary Disease, Decramer et al., 2012) and cigarette smoking (Phipps et al., 2010)  
405 have been reported to increase the risk of pneumococcal LRTI. Here, we reported the first  
406 study to show simultaneous transcriptomic changes of the pathogen *S. pneumoniae* and  
407 human lung alveolar epithelial cells during early infection. Additionally, we have made the  
408 time-resolved dual transcriptomics dataset available to the broader research community  
409 (<http://dualnaseq.molgenrug.nl>). We invite pneumococcal researchers to use the database  
410 to formulate research questions in the development of preventive and curative strategies  
411 against pneumococcal infection. To conclude, we call researchers from the fields of  
412 microbiology, immunology and pulmonology to access the dataset and use it to develop  
413 their own hypotheses.

414

## 415 **Methods**

### 416 **Culture of epithelial cell line, *S. pneumoniae* D39 and pneumococcal transformation**

417 Human type II lung epithelial cell line, A549 (ATCC® CCL-185) and *S. pneumoniae* D39  
418 were routinely cultured without antibiotics. Strain construction is described in detail in  
419 **Supplementary information**. Oligonucleotides are listed in **Supplementary Table 1** and  
420 strains in **Supplementary Table 2**.

### 421 **Infection studies**

422 Confluent monolayer of A549 was co-incubated with *S. pneumoniae* D39 at multiplicities of  
423 infection 10, in 1% fetal bovine serum in RPMI1640 without phenol red. Prior to infection,  
424 epithelial monolayer was kept for 10 more days after confluence. To optimize cell-to-cell  
425 contact, centrifugation was employed (2000 ×g, 5 min, 4°C). Adherence assays were

426 performed by enumeration of plated cfu in blood agar. More in **Supplementary**  
427 **information.**

#### 428 **Simultaneous total host-pathogen RNA isolation**

429 Before RNA isolation, samples were treated by saturated ammonium sulfate solution  
430 (Korfhage et al., 2002). Cells were disrupted by bead beating, and total RNA was isolated  
431 as described in the **Supplementary information.**

#### 432 **Library preparation, sequencing, data pipeline and online database**

433 Total RNA was dual rRNA-depleted, reverse-transcribed and sequenced on the Illumina  
434 NextSeq 500 in 75 nt single end mode. Raw reads were trimmed, aligned into chimeric  
435 human-pneumococcus genome. Reads were counted and differential gene expression  
436 analysis were performed to epithelial and pneumococcal libraries separately. Automatic  
437 clustering and GO enrichment were performed. The online database is built using in-house  
438 script. Significantly differentially expressed epithelial and pneumococcal genes are listed in  
439 **Supplementary Table 3 and 4**, respectively.

#### 440 **qRT-PCR and quantitative fluorescence microscopy**

441 Infection studies were repeated, total RNA isolated and qRT-PCR is performed. For  
442 fluorescence microscopy, infection studies were performed in 8-wells  $\mu$ -slides (Ibidi, DE).  
443 More in **Supplementary information.**

#### 444 **Accession Numbers**

445 The raw data is accessible at <http://www.ncbi.nlm.nih.gov/geo/> with accession number  
446 GSE79595.

447

## 448 **Author Contribution**

449 R.A and J.W.V. designed the research, analyzed the data and wrote article. R.A performed  
450 research, J.S analyzed the data, S.H. built online database.

451

## 452 **Acknowledgements**

453 We thank W.J. Quax and R. Setroikromo (UMCG, Groningen) for the human cell line, V.  
454 Benes and B. Haase (GeneCore, EMBL, Heidelberg) for sequencing support, M. Kjos for  
455 fruitful discussions and A. de Jong for bioinformatics support. We thank S. El Aidy and L.E.  
456 Keller for comments on the manuscript. Work in Veening lab is supported by the EMBO  
457 Young Investigator Program, VIDI fellowship (864.12.001) from the Netherlands  
458 Organization for Scientific Research, Earth and Life Sciences (NWO-ALW), and ERC  
459 Starting Grant 337399-PneumoCell.

460

## 461 **Conflict of Interest**

462 None

463

## 464 **References**

465 Abeyta, M., Hardy, G.G., and Yother, J. (2003). Genetic alteration of capsule type but not  
466 PspA type affects accessibility of surface-bound complement and surface antigens of  
467 *Streptococcus pneumoniae*. *Infect. Immun.* 71, 218–225.

468 Attaiech, L., Olivier, A., Mortier-Barrière, I., Soulet, A.-L., Granadel, C., Martin, B., Polard,  
469 P., and Claverys, J.-P. (2011). Role of the Single-Stranded DNA-Binding Protein SsbB in  
470 Pneumococcal Transformation: Maintenance of a Reservoir for Genetic Plasticity. *PLOS*  
471 *Genet* 7, e1002156.

- 472 Avraham, R., Haseley, N., Brown, D., Penaranda, C., Jijon, H.B., Trombetta, J.J., Satija, R.,  
473 Shalek, A.K., Xavier, R.J., Regev, A., et al. (2015). Pathogen Cell-to-Cell Variability Drives  
474 Heterogeneity in Host Immune Responses. *Cell* 162, 1309–1321.
- 475 Baddal, B., Muzzi, A., Censini, S., Calogero, R.A., Torricelli, G., Guidotti, S., Taddei, A.R.,  
476 Covacci, A., Pizza, M., Rappuoli, R., et al. (2015). Dual RNA-seq of Nontypeable  
477 *Haemophilus influenzae* and Host Cell Transcriptomes Reveals Novel Insights into Host-  
478 Pathogen Cross Talk. *mBio* 6, e01765–15.
- 479 Beiter, K., Wartha, F., Hurwitz, R., Normark, S., Zychlinsky, A., and Henriques-Normark, B.  
480 (2008). The Capsule Sensitizes *Streptococcus pneumoniae* to  $\alpha$ -Defensins Human  
481 Neutrophil Proteins 1 to 3. *Infect. Immun.* 76, 3710–3716.
- 482 Bidossi, A., Mulas, L., Decorosi, F., Colomba, L., Ricci, S., Pozzi, G., Deutscher, J., Viti, C.,  
483 and Oggioni, M.R. (2012). A Functional Genomics Approach to Establish the Complement  
484 of Carbohydrate Transporters in *Streptococcus pneumoniae* . *PLoS ONE* 7, e33320.
- 485 Bogaert, D., De Groot, R., and Hermans, P.W.M. (2004). *Streptococcus pneumoniae*  
486 colonisation: the key to pneumococcal disease. *Lancet Infect. Dis.* 4, 144–154.
- 487 Bolger, A.M., Lohse, M., and Usadel, B. (2014). Trimmomatic: A flexible trimmer for Illumina  
488 Sequence Data. *Bioinformatics* btu170.
- 489 Bootsma, H.J., Egmont-Petersen, M., and Hermans, P.W.M. (2007). Analysis of the In Vitro  
490 Transcriptional Response of Human Pharyngeal Epithelial Cells to Adherent *Streptococcus*  
491 *pneumoniae*: Evidence for a Distinct Response to Encapsulated Strains. *Infect. Immun.* 75,  
492 5489–5499.
- 493 Camilios-Neto, D., Bonato, P., Wasseem, R., Tadra-Sfeir, M.Z., Brusamarello-Santos, L.C.,  
494 Valdameri, G., Donatti, L., Faoro, H., Weiss, V.A., Chubatsu, L.S., et al. (2014). Dual RNA-  
495 seq transcriptional analysis of wheat roots colonized by *Azospirillum brasilense* reveals up-  
496 regulation of nutrient acquisition and cell cycle genes. *BMC Genomics* 15, 378.
- 497 Carvalho, S.M., Kloosterman, T.G., Kuipers, O.P., and Neves, A.R. (2011). CcpA Ensures  
498 Optimal Metabolic Fitness of *Streptococcus pneumoniae*. *PLoS ONE* 6, e26707.
- 499 Choi, Y.-J., Aliota, M.T., Mayhew, G.F., Erickson, S.M., and Christensen, B.M. (2014). Dual  
500 RNA-seq of Parasite and Host Reveals Gene Expression Dynamics during Filarial Worm–  
501 Mosquito Interactions. *PLOS Negl Trop Dis* 8, e2905.
- 502 Decramer, M., Janssens, W., and Miravittles, M. (2012). Chronic obstructive pulmonary  
503 disease. *The Lancet* 379, 1341–1351.
- 504 Dennis, G., Sherman, B.T., Hosack, D.A., Yang, J., Gao, W., Lane, H.C., and Lempicki,  
505 R.A. (2003). DAVID: Database for Annotation, Visualization, and Integrated Discovery.  
506 *Genome Biol.* 4, P3.
- 507 Dillon, L.A.L., Suresh, R., Okrah, K., Corrada Bravo, H., Mosser, D.M., and El-Sayed, N.M.  
508 (2015). Simultaneous transcriptional profiling of *Leishmania major* and its murine  
509 macrophage host cell reveals insights into host-pathogen interactions. *BMC Genomics* 16,  
510 1108.

- 511 Dobin, A., Davis, C.A., Schlesinger, F., Drenkow, J., Zaleski, C., Jha, S., Batut, P.,  
512 Chaisson, M., and Gingeras, T.R. (2013). STAR: ultrafast universal RNA-seq aligner.  
513 *Bioinforma. Oxf. Engl.* 29, 15–21.
- 514 Forman, H.J., Zhang, H., and Rinna, A. (2009). Glutathione: Overview of its protective  
515 roles, measurement, and biosynthesis. *Mol. Aspects Med.* 30, 1–12.
- 516 Graham, R.M.A., and Paton, J.C. (2006). Differential Role of CbpA and PspA in Modulation  
517 of In Vitro CXC Chemokine Responses of Respiratory Epithelial Cells to Infection with  
518 *Streptococcus pneumoniae*. *Infect. Immun.* 74, 6739–6749.
- 519 Gray, R.D., Duncan, A., Noble, D., Imrie, M., O'Reilly, D.S.J., Innes, J.A., Porteous, D.J.,  
520 Greening, A.P., and Boyd, A.C. (2010). Sputum trace metals are biomarkers of  
521 inflammatory and suppurative lung disease. *Chest* 137, 635–641.
- 522 Hackett, N.R., Butler, M.W., Shaykhiev, R., Salit, J., Omberg, L., Rodriguez-Flores, J.L.,  
523 Mezey, J.G., Strulovici-Barel, Y., Wang, G., Didon, L., et al. (2012). RNA-Seq quantification  
524 of the human small airway epithelium transcriptome. *BMC Genomics* 13, 82.
- 525 Hallstrand, T.S., Hackett, T.L., Altemeier, W.A., Matute-Bello, G., Hansbro, P.M., and  
526 Knight, D.A. (2014). Airway epithelial regulation of pulmonary immune homeostasis and  
527 inflammation. *Clin. Immunol. Orlando Fla* 151, 1–15.
- 528 Hammerschmidt, S., Bergmann, S., Paterson, G.K., and Mitchell, T.J. (2007). Pathogenesis  
529 of *Streptococcus pneumoniae* infections :adaptive immunity, innate immunity, cell biology,  
530 virulence factors. In *Community-Acquired Pneumonia*, (Birkhäuser Basel), pp. 139–181.
- 531 Hussell, T., and Bell, T.J. (2014). Alveolar macrophages: plasticity in a tissue-specific  
532 context. *Nat. Rev. Immunol.* 14, 81–93.
- 533 Hvalbye, B.K.R., Aaberge, I.S., Løvik, M., and Haneberg, B. (1999). Intranasal  
534 Immunization with Heat-Inactivated *Streptococcus pneumoniae* Protects Mice against  
535 Systemic Pneumococcal Infection. *Infect. Immun.* 67, 4320–4325.
- 536 Hyams, C., Camberlein, E., Cohen, J.M., Bax, K., and Brown, J.S. (2010). The  
537 *Streptococcus pneumoniae* Capsule Inhibits Complement Activity and Neutrophil  
538 Phagocytosis by Multiple Mechanisms. *Infect. Immun.* 78, 704–715.
- 539 Jenner, R.G., and Young, R.A. (2005). Insights into host responses against pathogens from  
540 transcriptional profiling. *Nat. Rev. Microbiol.* 3, 281–294.
- 541 Jørgensen, M.G., van Raaphorst, R., and Veening, J.-W. (2013). Chapter 6 - Noise and  
542 Stochasticity in Gene Expression: A Pathogenic Fate Determinant. In *Methods in*  
543 *Microbiology*, C.H. and A. Wipat, ed. (Academic Press), pp. 157–175.
- 544 Kadioglu, A., Weiser, J.N., Paton, J.C., and Andrew, P.W. (2008). The role of  
545 *Streptococcus pneumoniae* virulence factors in host respiratory colonization and disease.  
546 *Nat. Rev. Microbiol.* 6, 288–301.
- 547 Kash, J.C., Walters, K.-A., Davis, A.S., Sandouk, A., Schwartzman, L.M., Jagger, B.W.,  
548 Chertow, D.S., Li, Q., Kuestner, R.E., Ozinsky, A., et al. (2011). Lethal synergism of 2009



- 549 pandemic H1N1 influenza virus and *Streptococcus pneumoniae* coinfection is associated  
550 with loss of murine lung repair responses. *mBio* 2.
- 551 Kietzman, C.C., Gao, G., Mann, B., Myers, L., and Tuomanen, E.I. (2016). Dynamic  
552 capsule restructuring by the main pneumococcal autolysin LytA in response to the  
553 epithelium. *Nat. Commun.* 7, 10859.
- 554 Kjos, M., Aprianto, R., Fernandes, V.E., Andrew, P.W., van Strijp, J.A.G., Nijland, R., and  
555 Veening, J.-W. (2015). Bright fluorescent *Streptococcus pneumoniae* for live-cell imaging of  
556 host-pathogen interactions. *J. Bacteriol.* 197, 807–818.
- 557 Korfhage, C., Wyrich, R., and Oelmüller, U. (2002). Ammonium sulfate for neutralization of  
558 inhibitory effects (Google Patents).
- 559 Krisanaprakornkit, S., Weinberg, A., Perez, C.N., and Dale, B.A. (1998). Expression of the  
560 peptide antibiotic human beta-defensin 1 in cultured gingival epithelial cells and gingival  
561 tissue. *Infect. Immun.* 66, 4222–4228.
- 562 Kröger, C., Colgan, A., Srikumar, S., Händler, K., Sivasankaran, S.K., Hammarlöf, D.L.,  
563 Canals, R., Grissom, J.E., Conway, T., Hokamp, K., et al. (2013). An Infection-Relevant  
564 Transcriptomic Compendium for *Salmonella enterica* Serovar Typhimurium. *Cell Host*  
565 *Microbe* 14, 683–695.
- 566 Kukurba, K.R., and Montgomery, S.B. (2015). RNA Sequencing and Analysis. *Cold Spring*  
567 *Harb. Protoc.* 2015, pdb.top084970.
- 568 Kumar, L., and E. Futschik, M. (2007). Mfuzz: A software package for soft clustering of  
569 microarray data. *Bioinformatics* 2, 5–7.
- 570 Lee, H.-Y., Andalibi, A., Webster, P., Moon, S.-K., Teufert, K., Kang, S.-H., Li, J.-D.,  
571 Nagura, M., Ganz, T., and Lim, D.J. (2004). Antimicrobial activity of innate immune  
572 molecules against *Streptococcus pneumoniae*, *Moraxella catarrhalis* and nontypeable  
573 *Haemophilus influenzae*. *BMC Infect. Dis.* 4, 12.
- 574 Liao, Y., Smyth, G.K., and Shi, W. (2014). featureCounts: an efficient general purpose  
575 program for assigning sequence reads to genomic features. *Bioinforma. Oxf. Engl.* 30, 923–  
576 930.
- 577 Livak, K.J., and Schmittgen, T.D. (2001). Analysis of relative gene expression data using  
578 real-time quantitative PCR and the 2<sup>-</sup>(Delta Delta C(T)) Method. *Methods San Diego Calif*  
579 25, 402–408.
- 580 Love, M.I., Huber, W., and Anders, S. (2014). Moderated estimation of fold change and  
581 dispersion for RNA-seq data with DESeq2. *Genome Biol.* 15, 550.
- 582 Lysenko, E.S., Lijek, R.S., Brown, S.P., and Weiser, J.N. (2010). Within-Host Competition  
583 Drives Selection for the Capsule Virulence Determinant of *Streptococcus pneumoniae*.  
584 *Curr. Biol.* 20, 1222–1226.
- 585 Martin, B., Prudhomme, M., Alloing, G., Granadel, C., and Claverys, J.P. (2000). Cross-  
586 regulation of competence pheromone production and export in the early control of  
587 transformation in *Streptococcus pneumoniae*. *Mol. Microbiol.* 38, 867–878.



- 588 Mlacha, S.Z.K., Romero-Steiner, S., Hotopp, J.C.D., Kumar, N., Ishmael, N., Riley, D.R.,  
589 Farooq, U., Creasy, T.H., Tallon, L.J., and Liu, X. (2013). Phenotypic, genomic, and  
590 transcriptional characterization of *Streptococcus pneumoniae* interacting with human  
591 pharyngeal cells. *BMC Genomics* 14, 383.
- 592 Nelson, A.L., Roche, A.M., Gould, J.M., Chim, K., Ratner, A.J., and Weiser, J.N. (2007).  
593 Capsule enhances pneumococcal colonization by limiting mucus-mediated clearance.  
594 *Infect. Immun.* 75, 83–90.
- 595 Nicolas, P., Mäder, U., Dervyn, E., Rochat, T., Leduc, A., Pigeonneau, N., Bidnenko, E.,  
596 Marchadier, E., Hoebeke, M., Aymerich, S., et al. (2012). Condition-dependent  
597 transcriptome reveals high-level regulatory architecture in *Bacillus subtilis*. *Science* 335,  
598 1103–1106.
- 599 Ning, K., Fermin, D., and Nesvizhskii, A.I. (2012). Comparative analysis of different label-  
600 free mass spectrometry based protein abundance estimates and their correlation with RNA-  
601 Seq gene expression data. *J. Proteome Res.* 11, 2261–2271.
- 602 van Opijnen, T., and Camilli, A. (2012). A fine scale phenotype-genotype virulence map of a  
603 bacterial pathogen. *Genome Res.* 22, 2541–2551.
- 604 Pedersen, M., Nissen, S., Mitarai, N., Svenningsen, S.L., Sneppen, K., and Pedersen, S.  
605 (2011). The Functional Half-Life of an mRNA Depends on the Ribosome Spacing in an  
606 Early Coding Region. *J. Mol. Biol.* 407, 35–44.
- 607 Phipps, J.C., Aronoff, D.M., Curtis, J.L., Goel, D., O'Brien, E., and Mancuso, P. (2010).  
608 Cigarette Smoke Exposure Impairs Pulmonary Bacterial Clearance and Alveolar  
609 Macrophage Complement-Mediated Phagocytosis of *Streptococcus pneumoniae*. *Infect.*  
610 *Immun.* 78, 1214–1220.
- 611 Prina, E., Ranzani, O.T., and Torres, A. (2015). Community-acquired pneumonia. *The*  
612 *Lancet* 386, 1097–1108.
- 613 Rai, P., Parrish, M., Tay, I.J.J., Li, N., Ackerman, S., He, F., Kwang, J., Chow, V.T., and  
614 Engelward, B.P. (2015). *Streptococcus pneumoniae* secretes hydrogen peroxide leading to  
615 DNA damage and apoptosis in lung cells. *Proc. Natl. Acad. Sci.* 112, E3421–E3430.
- 616 Rajam, G., Anderton, J.M., Carlone, G.M., Sampson, J.S., and Ades, E.W. (2008).  
617 Pneumococcal surface adhesin A (PsaA): a review. *Crit. Rev. Microbiol.* 34, 131–142.
- 618 Rose, M.C., and Voynow, J.A. (2006). Respiratory tract mucin genes and mucin  
619 glycoproteins in health and disease. *Physiol. Rev.* 86, 245–278.
- 620 Shelburne, S.A., Davenport, M.T., Keith, D.B., and Musser, J.M. (2008). The role of  
621 complex carbohydrate catabolism in the pathogenesis of invasive streptococci. *Trends*  
622 *Microbiol.* 16, 318–325.
- 623 Siegel, S.J., Roche, A.M., and Weiser, J.N. (2014). Influenza promotes pneumococcal  
624 growth during coinfection by providing host sialylated substrates as a nutrient source. *Cell*  
625 *Host Microbe* 16, 55–67.

- 626 Sorek, R., and Cossart, P. (2010). Prokaryotic transcriptomics: a new view on regulation,  
627 physiology and pathogenicity. *Nat. Rev. Genet.* *11*, 9–16.
- 628 Soumelis, V., Reche, P.A., Kanzler, H., Yuan, W., Edward, G., Homey, B., Gilliet, M., Ho,  
629 S., Antonenko, S., Lauerma, A., et al. (2002). Human epithelial cells trigger dendritic cell  
630 mediated allergic inflammation by producing TSLP. *Nat. Immunol.* *3*, 673–680.
- 631 St-Pierre, C., Brochu, S., Vanegas, J.R., Dumont-Lagacé, M., Lemieux, S., and Perreault,  
632 C. (2013). Transcriptome sequencing of neonatal thymic epithelial cells. *Sci. Rep.* *3*, 1860.
- 633 Talbot, T.R., Hartert, T.V., Mitchel, E., Halasa, N.B., Arbogast, P.G., Poehling, K.A.,  
634 Schaffner, W., Craig, A.S., and Griffin, M.R. (2005). Asthma as a risk factor for invasive  
635 pneumococcal disease. *N. Engl. J. Med.* *352*, 2082–2090.
- 636 Taniguchi, Y., Choi, P.J., Li, G.-W., Chen, H., Babu, M., Hearn, J., Emili, A., and Xie, X.S.  
637 (2010). Quantifying *E. coli* proteome and transcriptome with single-molecule sensitivity in  
638 single cells. *Science* *329*, 533–538.
- 639 Tecle, T., Tripathi, S., and Hartshorn, K.L. (2010). Review: Defensins and cathelicidins in  
640 lung immunity. *Innate Immun.* *16*, 151–159.
- 641 The ENCODE Consortium (2011). Standards, Guidelines and Best Practices for RNA-Seq.  
642 <https://www.encodeproject.org/>
- 643 Tseng, H.-J., McEwan, A.G., Paton, J.C., and Jennings, M.P. (2002). Virulence of  
644 *Streptococcus pneumoniae*: PsaA mutants are hypersensitive to oxidative stress. *Infect.*  
645 *Immun.* *70*, 1635–1639.
- 646 Valko, M., Leibfritz, D., Moncol, J., Cronin, M.T.D., Mazur, M., and Telser, J. (2007). Free  
647 radicals and antioxidants in normal physiological functions and human disease. *Int. J.*  
648 *Biochem. Cell Biol.* *39*, 44–84.
- 649 Vogel, C., and Marcotte, E.M. (2012). Insights into the regulation of protein abundance from  
650 proteomic and transcriptomic analyses. *Nat. Rev. Genet.* *13*, 227–232.
- 651 Voynow, J.A., and Rubin, B.K. (2009). Mucins, Mucus, and Sputum. *Chest* *135*, 505–512.
- 652 Wagner, G.P., Kin, K., and Lynch, V.J. (2012). Measurement of mRNA abundance using  
653 RNA-seq data: RPKM measure is inconsistent among samples. *Theory Biosci. Theor. Den*  
654 *Biowissenschaften* *131*, 281–285.
- 655 Westermann, A.J., Gorski, S.A., and Vogel, J. (2012). Dual RNA-seq of pathogen and host.  
656 *Nat. Rev. Microbiol.* *10*, 618–630.
- 657 Westermann, A.J., Förstner, K.U., Amman, F., Barquist, L., Chao, Y., Schulte, L.N., Müller,  
658 L., Reinhardt, R., Stadler, P.F., and Vogel, J. (2016). Dual RNA-seq unveils noncoding RNA  
659 functions in host-pathogen interactions. *Nature* *529*, 496–501.
- 660 Yesilkaya, H., Manco, S., Kadioglu, A., Terra, V.S., and Andrew, P.W. (2008). The ability to  
661 utilize mucin affects the regulation of virulence gene expression in *Streptococcus*  
662 *pneumoniae*. *FEMS Microbiol. Lett.* *278*, 231–235.

663 Zahlten, J., Kim, Y.-J., Doehn, J.-M., Pribyl, T., Hocke, A.C., García, P., Hammerschmidt,  
 664 S., Suttorp, N., Hippenstiel, S., and Hübner, R.-H. (2015). *Streptococcus pneumoniae*-  
 665 Induced Oxidative Stress in Lung Epithelial Cells Depends on Pneumococcal Autolysis and  
 666 Is Reversible by Resveratrol. *J. Infect. Dis.* 211, 1822–1830.

667

668 **Figures and Legends**

669

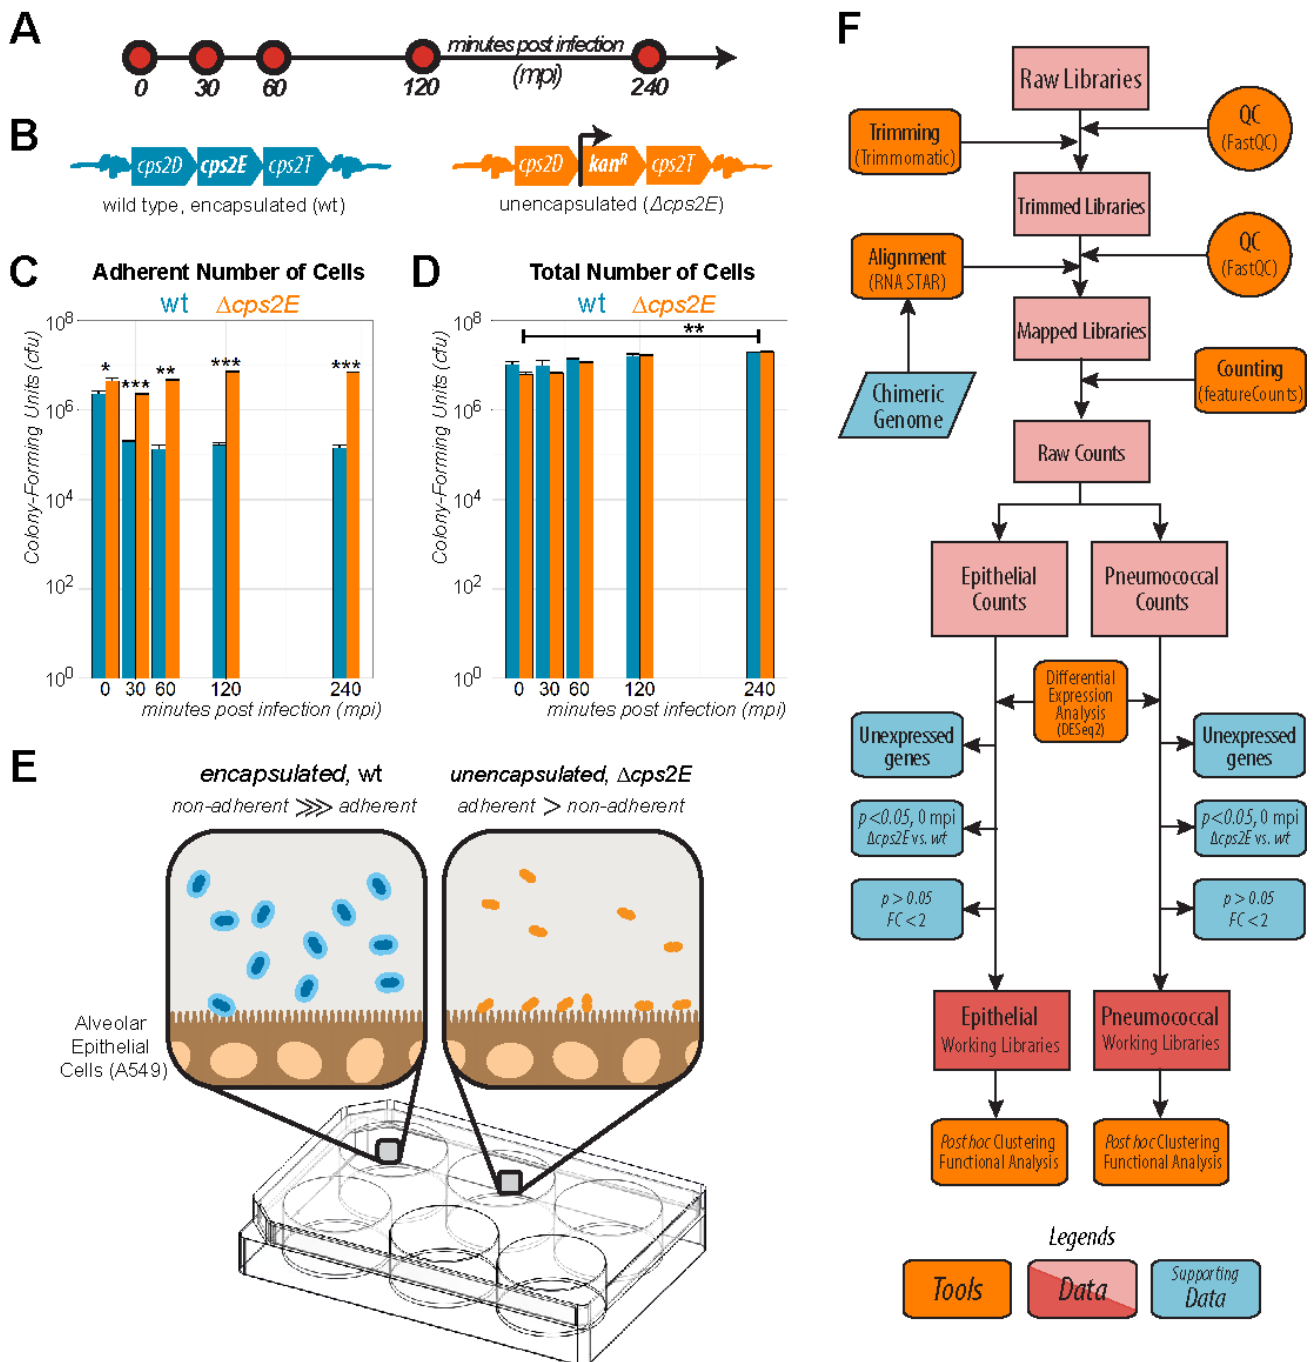

**Figure 1. The early infection model.** Confluent monolayer of alveolar epithelial cell line

(A549) was co-incubated with *S. pneumoniae* strain D39. **A.** We chose five infection time points: 0, 30, 60, 120 and 240 minutes post infection (mpi). **B.** Since adherence is a hallmark of infection, we used an unencapsulated strain, created by disrupting *cps2E* vital in capsule biogenesis. **C.**  $\Delta cps2E$  strain adhered more readily to epithelial cells than its encapsulated parental strain. 30 mpi,  $\Delta cps2E$  (orange bar) showed significantly ( $p < 0.001$ ) more adherent cells than its parental strain (cyan bar). Data is presented as mean  $\pm$  SEM. **D.** At 240 mpi, both strains multiplied significantly ( $p < 0.01$ ) with no significant difference between strains. **E.** Encapsulated strain has more free-floating than adherent cells while  $\Delta cps2E$  has a higher fraction of adherent bacteria. **F.** After quality-check, low-quality reads were trimmed. Reads were aligned to a synthetic chimeric genome. Aligned reads were counted and classified as epithelial or as pneumococcal counts. We removed three gene fractions, clustered and performed functional enrichment to the working libraries.

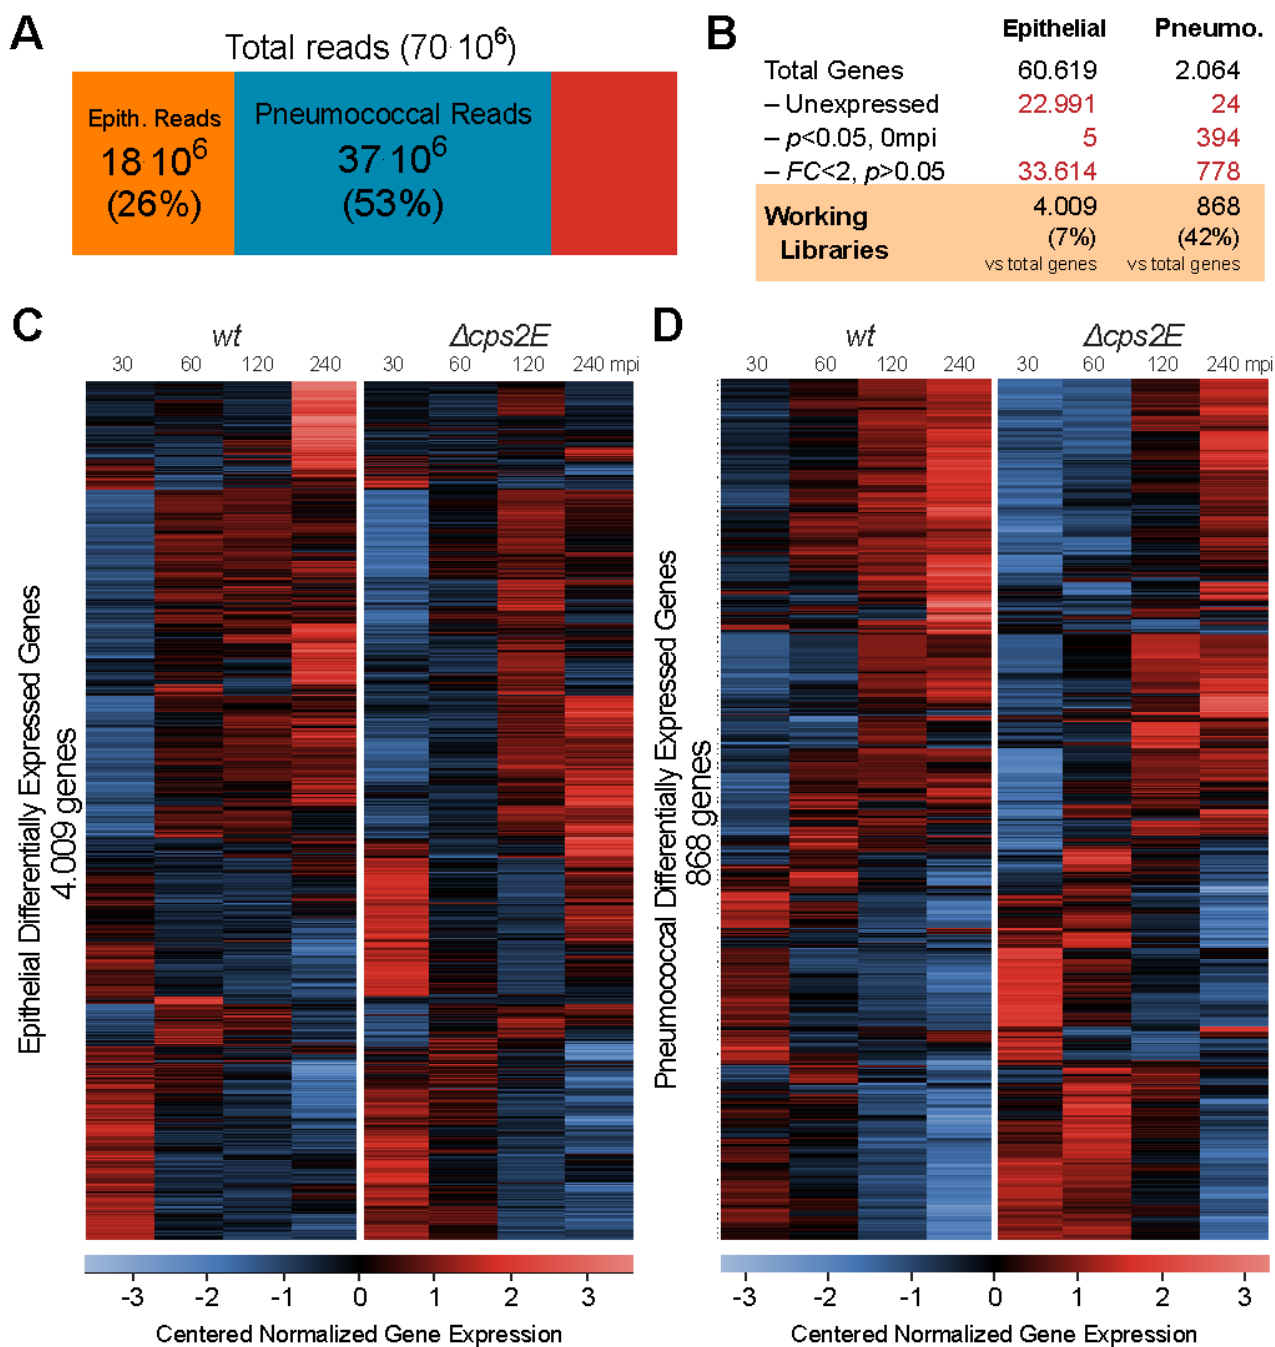

**Fig.2. Dual RNA-Seq generates high-quality datasets suitable for probing host-pathogen transcriptomes. A.** On average, there are 70 million reads per library: 18 million reads were mapped to the human genome while 37 million reads to pneumococcal genome. **B.** We excluded three gene fractions: unexpressed genes, i.e.: without counts in any libraries; genes that were differentially expressed at 0 mpi ( $p < 0.05$ ) between  $\Delta cps2E$

and wt libraries and genes with no statistical significance ( $p>0.05$ ) and fold change less than two ( $FC<2$ ) in all contrast. Epithelial working libraries contain 4,009 genes (7% of human genes) while pneumococcal working libraries 868 genes (42% pneumococcal genes). **C.** Gene expression in epithelial working libraries were normalized, centered and automatically clustered. The left panel shows epithelial genes in response to encapsulated strain while the right panel shows epithelial response to  $\Delta cps2E$  *S. pneumoniae* at different time points. Clear clusters of co-expressed epithelial genes can be observed in the heat map. Blue indicates a relatively lower expression while red, a higher value. **D.** Correspondingly, we presented pneumococcal expression in the same manner: left panel shows wild type pneumococcal response to epithelial cells, while right panel shows  $\Delta cps2E$  response.

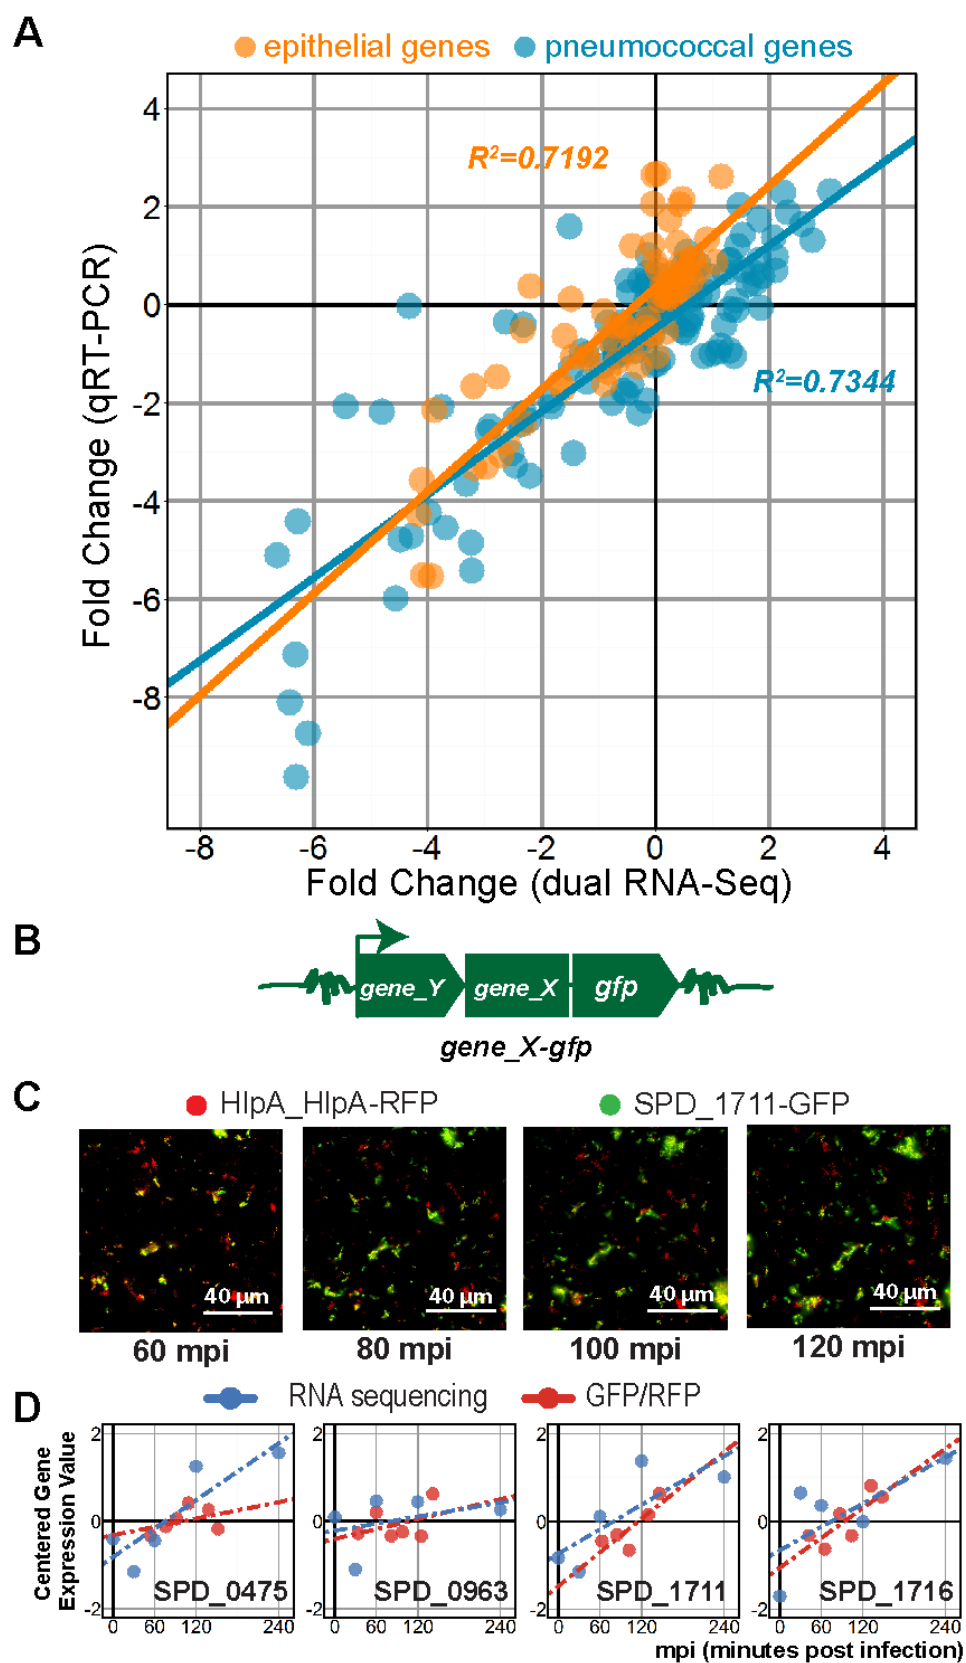

**Fig.3. Validation of dual RNA-Seq.** A. We confirmed dual RNA-Seq gene expression

values by qRT-PCR. The infection study was repeated in duplicates and total RNA was isolated as previously. Ten human and 19 pneumococcal genes were chosen as validation targets. We plotted fold changes from qRT-PCR against dual RNA-Seq fold changes and observed a high degree of correlation ( $R^2 > 0.7$ , Pearson) for both species. **B.** We also confirmed pneumococcal gene expression at the protein level by quantitative fluorescence microscopy. Four target genes (SPD\_0475, SPD\_0963, SPD\_1711 and SPD\_1716) were C-terminally tagged with GFP at their own locus. GFP-fusion were performed in the  $\Delta cps2E$  strain expressing RFP fused to HlpA. **C.** Non-deconvolved image of SPD\_1711-GFP in  $\Delta cps2E$  strain up to 120 mpi. While RFP emitted a relatively constant signal, the GFP signal increases. **D.** We plotted dual RNA-Seq expression values superimposed to the GFP/RFP ratio. To some extent, transcriptional changes corresponded to protein expression.



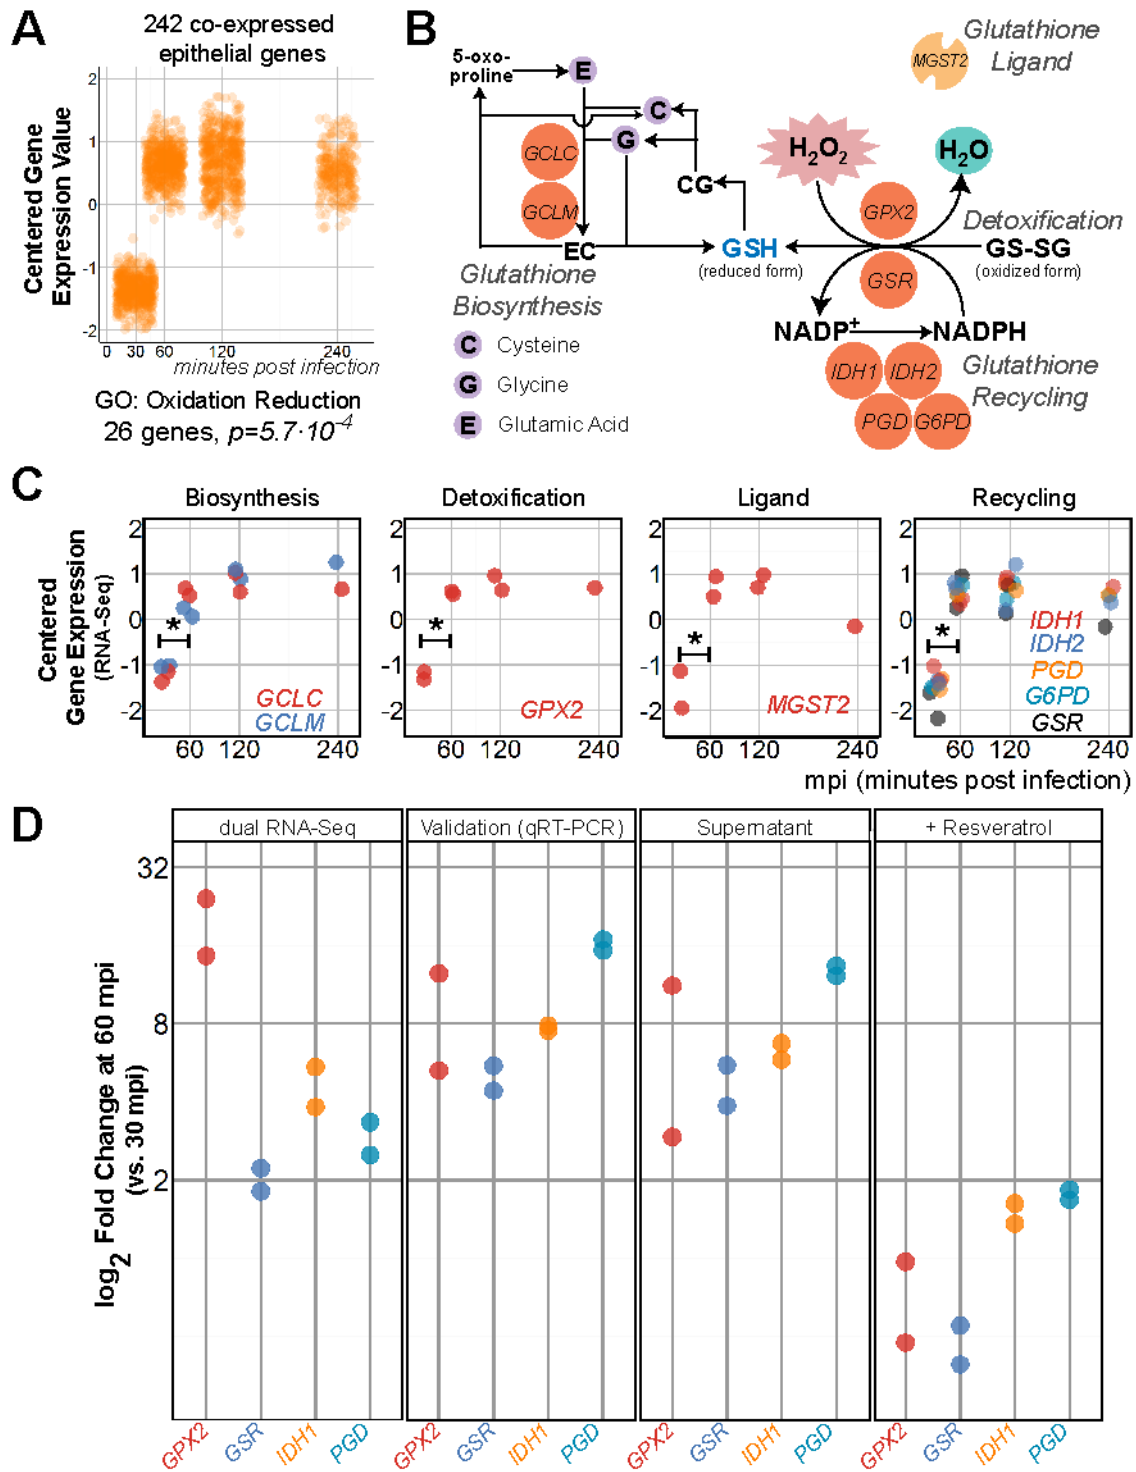

**Fig.4. Epithelial glutathione-associated genes are activated in response to pneumococcal ROS.** **A.** We clustered epithelial working libraries exposed to wild type pneumococci and found a cluster of 242 co-expressed genes showing sustained upregulation ( $p < 0.05$ ,  $FC > 2$ ) at 60 mpi compared to 30 mpi. GO analysis showed that

“oxidation reduction” was enriched in 26 genes ( $p=5.7 \cdot 10^{-4}$ ). **B.** Nine genes from the subset are associated with glutathione (GSH), an important antioxidant. Main glutathione-associated processes are biosynthesis of glutathione, detoxification of ROS assisted by ligand and glutathione recycling. **C.** Between 30 and 60 mpi, *GCLC* was increased  $2.3 \pm 1.1$  times and *GCLM*  $2.4 \pm 1.2$  times. *GPX2*, the main detoxification gene was activated  $18.7 \pm 1.3$  times while the ligand, *MGST2*  $3.2 \pm 1.2$  times. Genes involved in the recycling of glutathione were activated: *IDH1*,  $4.6 \pm 1.2$ ; *IDH2*,  $2.4 \pm 1.2$ ; *PGD*,  $2.9 \pm 1.2$ ; *G6PD*,  $6.6 \pm 1.2$  and *GSR*,  $2.0 \pm 1.1$  times. **D.** We validated *GPX2*, *GSR*, *IDH1* and *PGD* expression with qRT-PCR. Epithelial incubation with pneumococcal supernatant showed similar upregulation of glutathione-associated genes. Addition of resveratrol ( $100 \mu\text{M}$ ) into the model diminished the upregulation ( $FC < 2$ ) altogether.

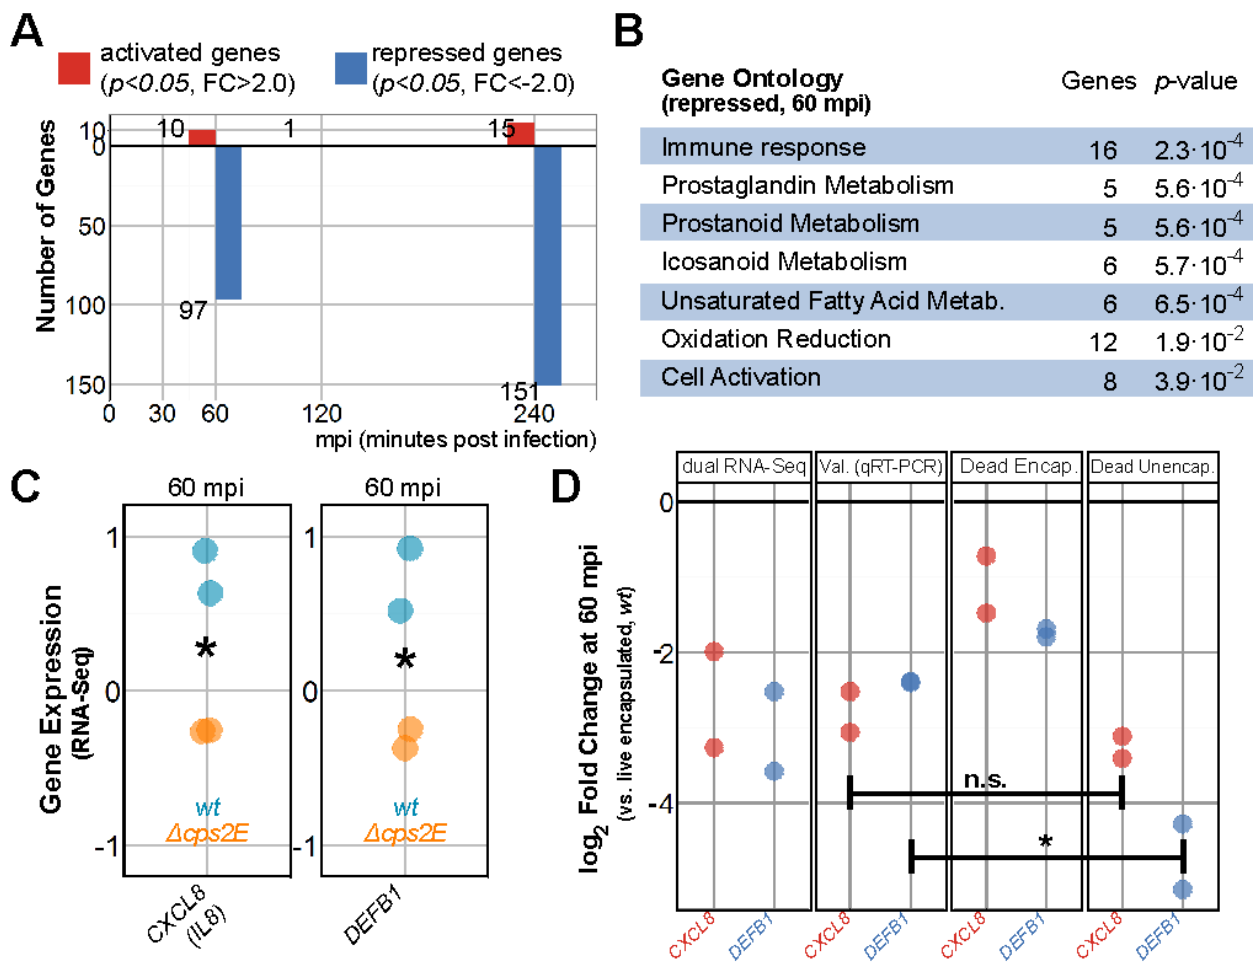

**Fig.5. Adherent *S. pneumoniae* repress epithelial innate immune responses. A.** At 60 mpi, 97 epithelial genes were significantly repressed upon exposure to  $\Delta cps2E$  bacteria compared to exposure to wild type pneumococci. **B.** GO term enrichment to 60 mpi repressed genes resulted in “immune response” (16 genes,  $p=2.3 \cdot 10^{-4}$ ), prostaglandin metabolism (5 genes,  $p=5.6 \cdot 10^{-4}$ ) and oxidation reduction (12 genes,  $p=0.019$ ) among others. **C.**  $\Delta cps2E$ -exposed epithelial cells expressed  $2.6 \pm 1.3$  fold less *CXCL8* and  $3.0 \pm 1.2$  fold less *DEFB1* than wild type-exposed epithelial cells. **D.** We validated *CXCL8* and *DEFB1* repression by qRT-PCR. Heat-inactivated encapsulated bacteria showed no repression of *CXCL8* and *DEFB1*, i.e., no difference ( $p > 0.05$ ) compared to viable encapsulated *S. pneumoniae* (Dead Encap.). While infection with heat-inactivated  $\Delta cps2E$  repressed *CXCL8* to the level of viable  $\Delta cps2E$ , *DEFB1* was more repressed ( $p < 0.05$ ) by

dead  $\Delta cps2E$  than by viable unencapsulated pneumococci.

673

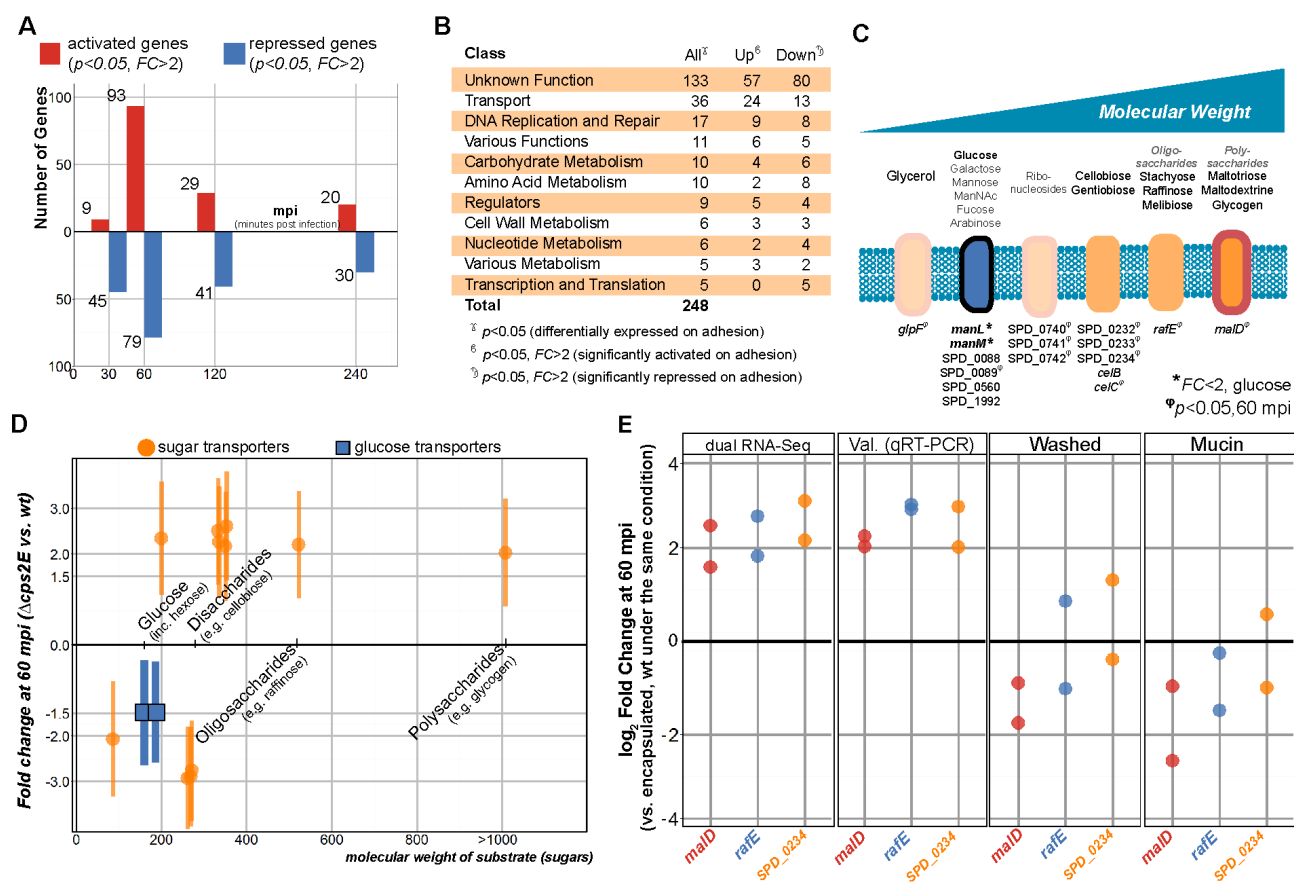

**Fig.6. Adherent pneumococci gain access to host-derived carbohydrates and activate non-glucose sugar importers.** **A.** 248 genes were differentially expressed between pneumococcal strains exposed to epithelial cells: 115 genes of the 248 genes were activated in  $\Delta cps2E$  compared to wt pneumococci while 138 genes were repressed. Note that five genes showed activation and repression at different time points. **B.** Most of the differentially-expressed genes are of unknown function (133 genes, 54% of 248), followed by cellular transport (36 genes, 15%) and DNA replication, repair and recombination (17 genes, 7%). **C.** 15 of the 36 transporter genes are described to transport carbohydrate. The carbohydrate-importers transport a wide range of carbohydrates, from

simple monosaccharides to complex polysaccharides. **D.** At 60 mpi, the expression of glucose transporters (*manLM*, blue boxes) is repressed ( $p < 0.05$ ,  $FC = 1.5$ ) in  $\Delta cps2E$  compared to encapsulated *S. pneumoniae*. Seven non-glucose transporters are activated ( $p < 0.05$ ,  $FC > 2$ ) in the  $\Delta cps2E$  strain: SPD\_0089, *ceiC*, SPD\_0232/33/34, *rafE* and *malD*. **E.** We validated the data by qRT-PCR for three sugar importers: *malD* (polysaccharides), *rafE* (oligosaccharide), and SPD\_0234 (non-glucose disaccharide). By removing epithelial mucus prior to infection, the importers were no longer activated in  $\Delta cps2E$  compared to wild type ( $FC < 2$ , Washed). Incubation with type III porcine mucin ( $5\text{g}\cdot\text{L}^{-1}$ ) did not activate the genes in  $\Delta cps2E$  compared to encapsulated pneumococci ( $FC < 2$ ).
